# Supplementary material
Source: publisher figshare collection journal article supplement (https://gsajournals.figshare.com/articles/dataset/_/28439153)
Supplement: Supplementary file 2 [file 1]

# Visual Breakdown of Shiny Apps

- This document serves as a visual walkthrough/breakdown of the Gene and Cluster and Cluster Enrichment shiny apps.
- This document will walk through how to access the apps using the code available in Text S3, how to use the different app features available in the sidebars, and breakdown each app's output.
- This guide is broken down into sections, with the first section walking through the Gene and Cluster app and the second walking through the Cluster Enrichment app.

# Gene and Cluster App Breakdown

To access shiny apps, paste code available in Text S3 into R script, install necessary packages, and read in shiny package.

The image shows a screenshot of an RStudio environment and a Notepad window. The RStudio window displays a script titled 'Untitled1\*' with the following R code:

```
1 #Paste the following into a R script to have access to our interactive shiny apps.
2
3 #R Script to access Gene Identification and Cluster enrichment Shiny apps
4 #Created: 8/22/2024
5
6 #You will need the following packages:
7 #Install if needed
8 install.packages("shiny")
9 install.packages("bslib")
10 install.packages("tidyverse")
11 install.packages("rms")
12 install.packages("DT")
13
14 library(shiny)
15
16 #Run the following to have access to our Gene and Cluster app.
17 #This allows users to look up specific genes, and receive information regarding their
18 #expression trajectory, cluster placement, and identification in young vs old analyses.
19 runGitHub("Gene_and_Cluster_Shiny", "Hanson19")
20
21
22 #Run the following to have access to our Cluster enrichment app.
23 #This allows users to view a cluster's enriched term, and have the ability to compare
24 #clusters and their enriched terms. You can select specific clusters you are interested in,
25 #and choose which types of terms you want shown.
26 runGitHub("Enrichment_Shiny", "Hanson19")
```

The RStudio console shows the following output:

```
> library(shiny)
> #Run the following to have access to our Gene and Cluster app.
> #This allows users to look up specific genes, and receive information regarding their
> #expression trajectory, cluster placement, and identification in young vs old analyses.
> runGitHub("Gene_and_Cluster_Shiny", "Hanson19")
Downloading https://github.com/Hanson19/Gene_and_Cluster_Shiny/archive/HEAD.tar.gz
```

The Notepad window, titled 'Shiny app R Script text - Notepad', contains the same R code as the RStudio script.

To access the Gene and Cluster app, run `runGitHub("Gene_and_Cluster_Shiny", "Hanson19")` on line 19 of the screenshot.

A new window should pop up and look like this.  
We have provided a brief description for each part of the app.

Submit gene with FBgn or Gene symbol

FBgn0024248

Choose Timeframe

Day

Changes the x-axis to survival, day or sampling point timeframe

### Gene Trajectories

After typing in a gene's symbol or FBgn number the app will inform whether the gene was identified in our analyses, plot the gene's cluster's expression trajectories with a representative curve, plot the individual gene's expression trajectory with all sampling point and normalized read counts, inform if the gene was identified in our Young vs Old Analysis, and list the published Young vs Old studies used in our paper that the gene was identified in.

IDs validated with FlyBase version FB2024\_03 on July 19th, 2024

If Gene Symbol has special characters, use FBgn Number.

FBgn Number or Gene Symbol

chico's (FBgn0024248) expression changes with aging and is in LinearUp-8. Identified in survival analysis, day analysis and sampling point analysis.

LinearUp-8

The gene's cluster's representative curve in black, and all other cluster genes' trajectories in gray.

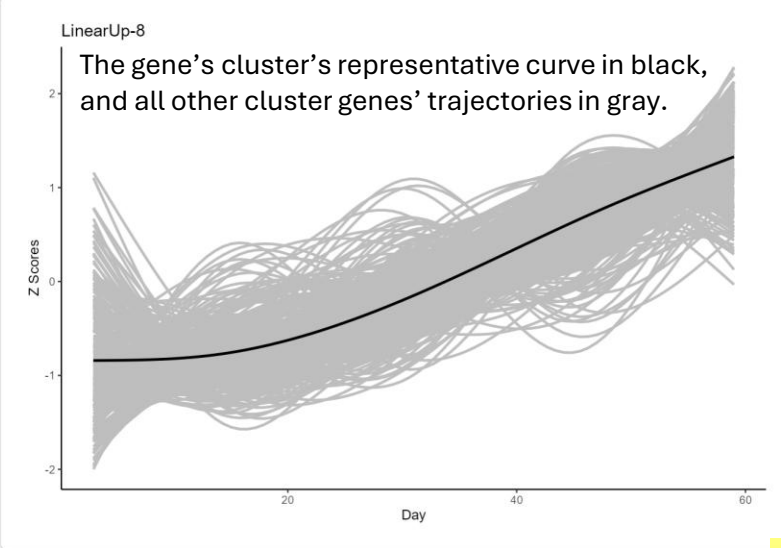

chico (FBgn0024248)

Each sample's normalized read count for gene of interest.



Information on if gene was identified in our analysis, what analyses it was identified in, and what cluster it is a part of.

FBgn0024248 was not identified in our Young v Old Analysis.

If the gene was identified in our YvO analysis using Day 59 samples as old

| validated_id | current_symbol | Official_ID | First_Author | Year | PMID     | website_address                                                                                   |
|--------------|----------------|-------------|--------------|------|----------|---------------------------------------------------------------------------------------------------|
| FBgn0024248  | chico          | LinearUp-8  | Carnes       | 2015 | 26378456 | <a href="https://pubmed.ncbi.nlm.nih.gov/26378456/">https://pubmed.ncbi.nlm.nih.gov/26378456/</a> |

Listed if the gene was identified in any of the previously published YvO analyses we used for comparisons.

# Additional example now using Gene symbol and a different timeframe

Gene Trajectories

Aftering typing in a gene's symbol or FBgn number the app will inform whether the gene was identified in our anlyses, plot the gene's cluster's expression trajectories with a representative curve, plot the individual gene's expression trajectory with all sampling point and normalized read counts, inform if the gene was identified in our Young vs Old Analysis, and list the published Young vs Old studies used in our paper that the gene was identified in.

IDs validated with FlyBase version FB2024\_03 on July 19th, 2024

If Gene Symbol has special characters, use FBgn Number.

FBgn Number or Gene Symbol

Indy

Choose Timeframe

Survival

Indy's (FBgn0036816) expression changes with aging and is in Complex-6. Identified in sampling point analysis.

Complex-6

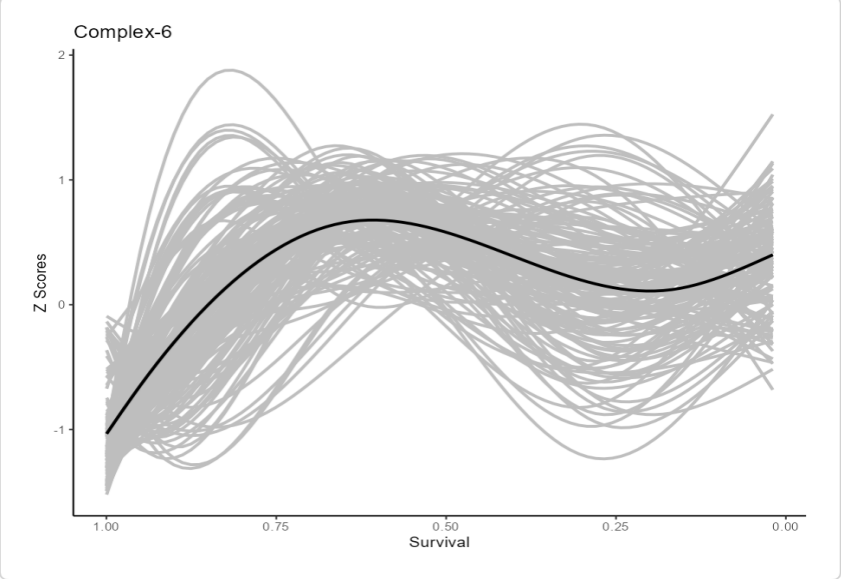

Indy (FBgn0036816)



Indy (FBgn0036816) was identified in our Young v Old Analysis.

| validated_id | current_symbol | Official_ID | First_Author | Year | PMID     | website_address                                                                                   |
|--------------|----------------|-------------|--------------|------|----------|---------------------------------------------------------------------------------------------------|
| FBgn0036816  | Indy           | Complex-6   | Carnes       | 2015 | 26378456 | <a href="https://pubmed.ncbi.nlm.nih.gov/26378456/">https://pubmed.ncbi.nlm.nih.gov/26378456/</a> |
| FBgn0036816  | Indy           | Complex-6   | Giradot      | 2006 | 16584578 | <a href="https://pubmed.ncbi.nlm.nih.gov/16584578/">https://pubmed.ncbi.nlm.nih.gov/16584578/</a> |
| FBgn0036816  | Indy           | Complex-6   | Highfill     | 2016 | 27485207 | <a href="https://pubmed.ncbi.nlm.nih.gov/27485207/">https://pubmed.ncbi.nlm.nih.gov/27485207/</a> |
| FBgn0036816  | Indy           | Complex-6   | Lai          | 2007 | 17196240 | <a href="https://pubmed.ncbi.nlm.nih.gov/17196240/">https://pubmed.ncbi.nlm.nih.gov/17196240/</a> |

If a gene's expression does not significantly change with aging, the app will still plot the gene's expression trajectory.

## Gene Trajectories

After typing in a gene's symbol or FBgn number the app will inform whether the gene was identified in our analyses, plot the gene's cluster's expression trajectories with a representative curve, plot the individual gene's expression trajectory with all sampling point and normalized read counts, inform if the gene was identified in our Young vs Old Analysis, and list the published Young vs Old studies used in our paper that the gene was identified in.

IDs validated with FlyBase version FB2024\_03 on July 19th, 2024

If Gene Symbol has special characters, use FBgn Number.

FBgn Number or Gene Symbol

Choose Timeframe

Day

RanBP3's (FBgn0039110) expression does not significantly change with aging.

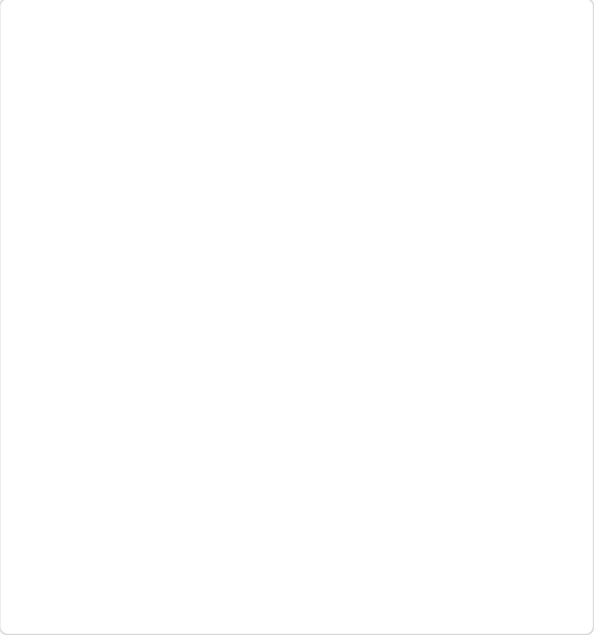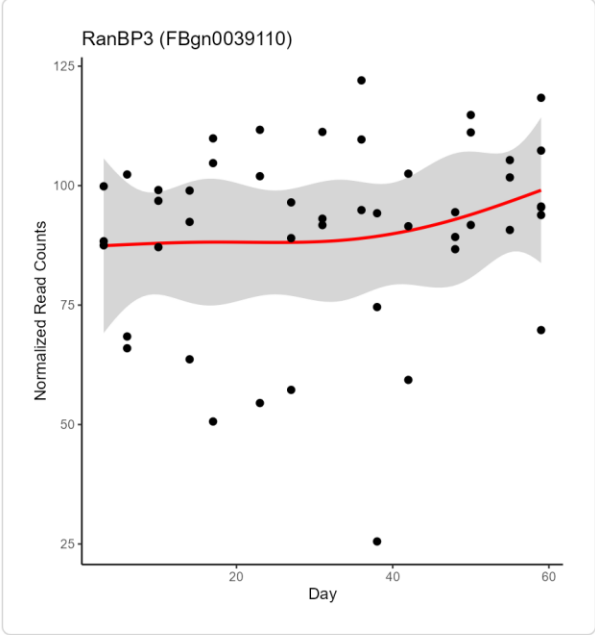

RanBP3 was not identified in our Young v Old Analysis.

If the submitted gene symbol or FBgn is not found within our data, the app will state that it was not identified. We do suggest to double check the spelling of the submitted ID to be sure. If using a gene symbol, we also suggest to try the gene’s FBgn in case the gene symbol has changed. As a reminder IDs were validated with FlyBase version FB2024\_03 on July 19<sup>th</sup>, 2024.

Gene Trajectories

Aftering typing in a gene's symbol or FBgn number the app will inform whether the gene was identified in our anlyses, plot the gene's cluster's expression trajectories with a representative curve, plot the individual gene's expression trajectory with all sampling point and normalized read counts, inform if the gene was identified in our Young vs Old Analysis, and list the published Young vs Old studies used in our paper that the gene was identified in.

IDs validated with FlyBase version FB2024\_03 on July 19th, 2024

If Gene Symbol has special characters, use FBgn Number.

FBgn Number or Gene Symbol

Choose Timeframe

Day

docs was not identified in our analysis. Check spelling of submitted ID to be sure.

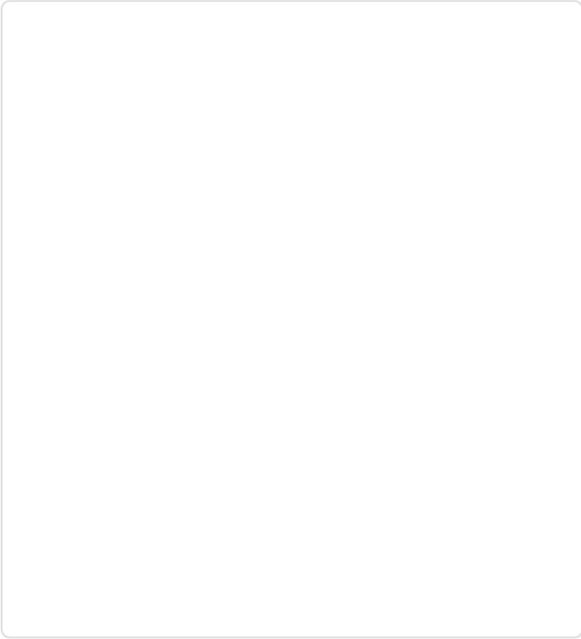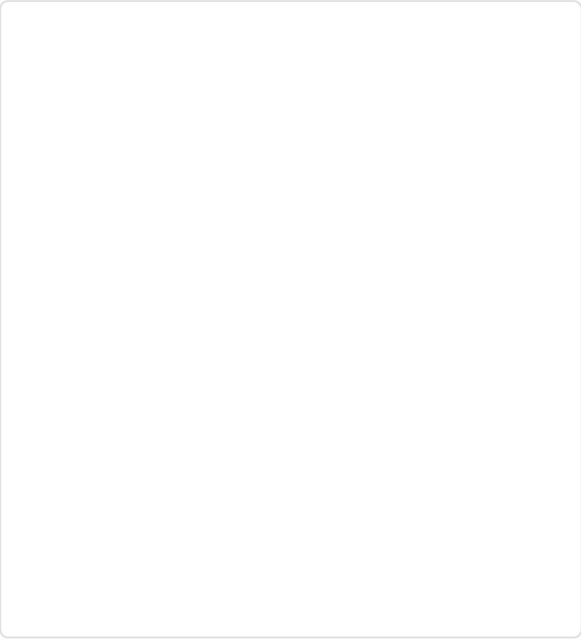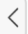

docs was not identified in our Young v Old Analysis.

# Cluster Enrichment App Breakdown



To access the cluster enrichment app , run `runGitHub("Enrichment_Shiny", Hanson19)` on line 26 of the screenshot.

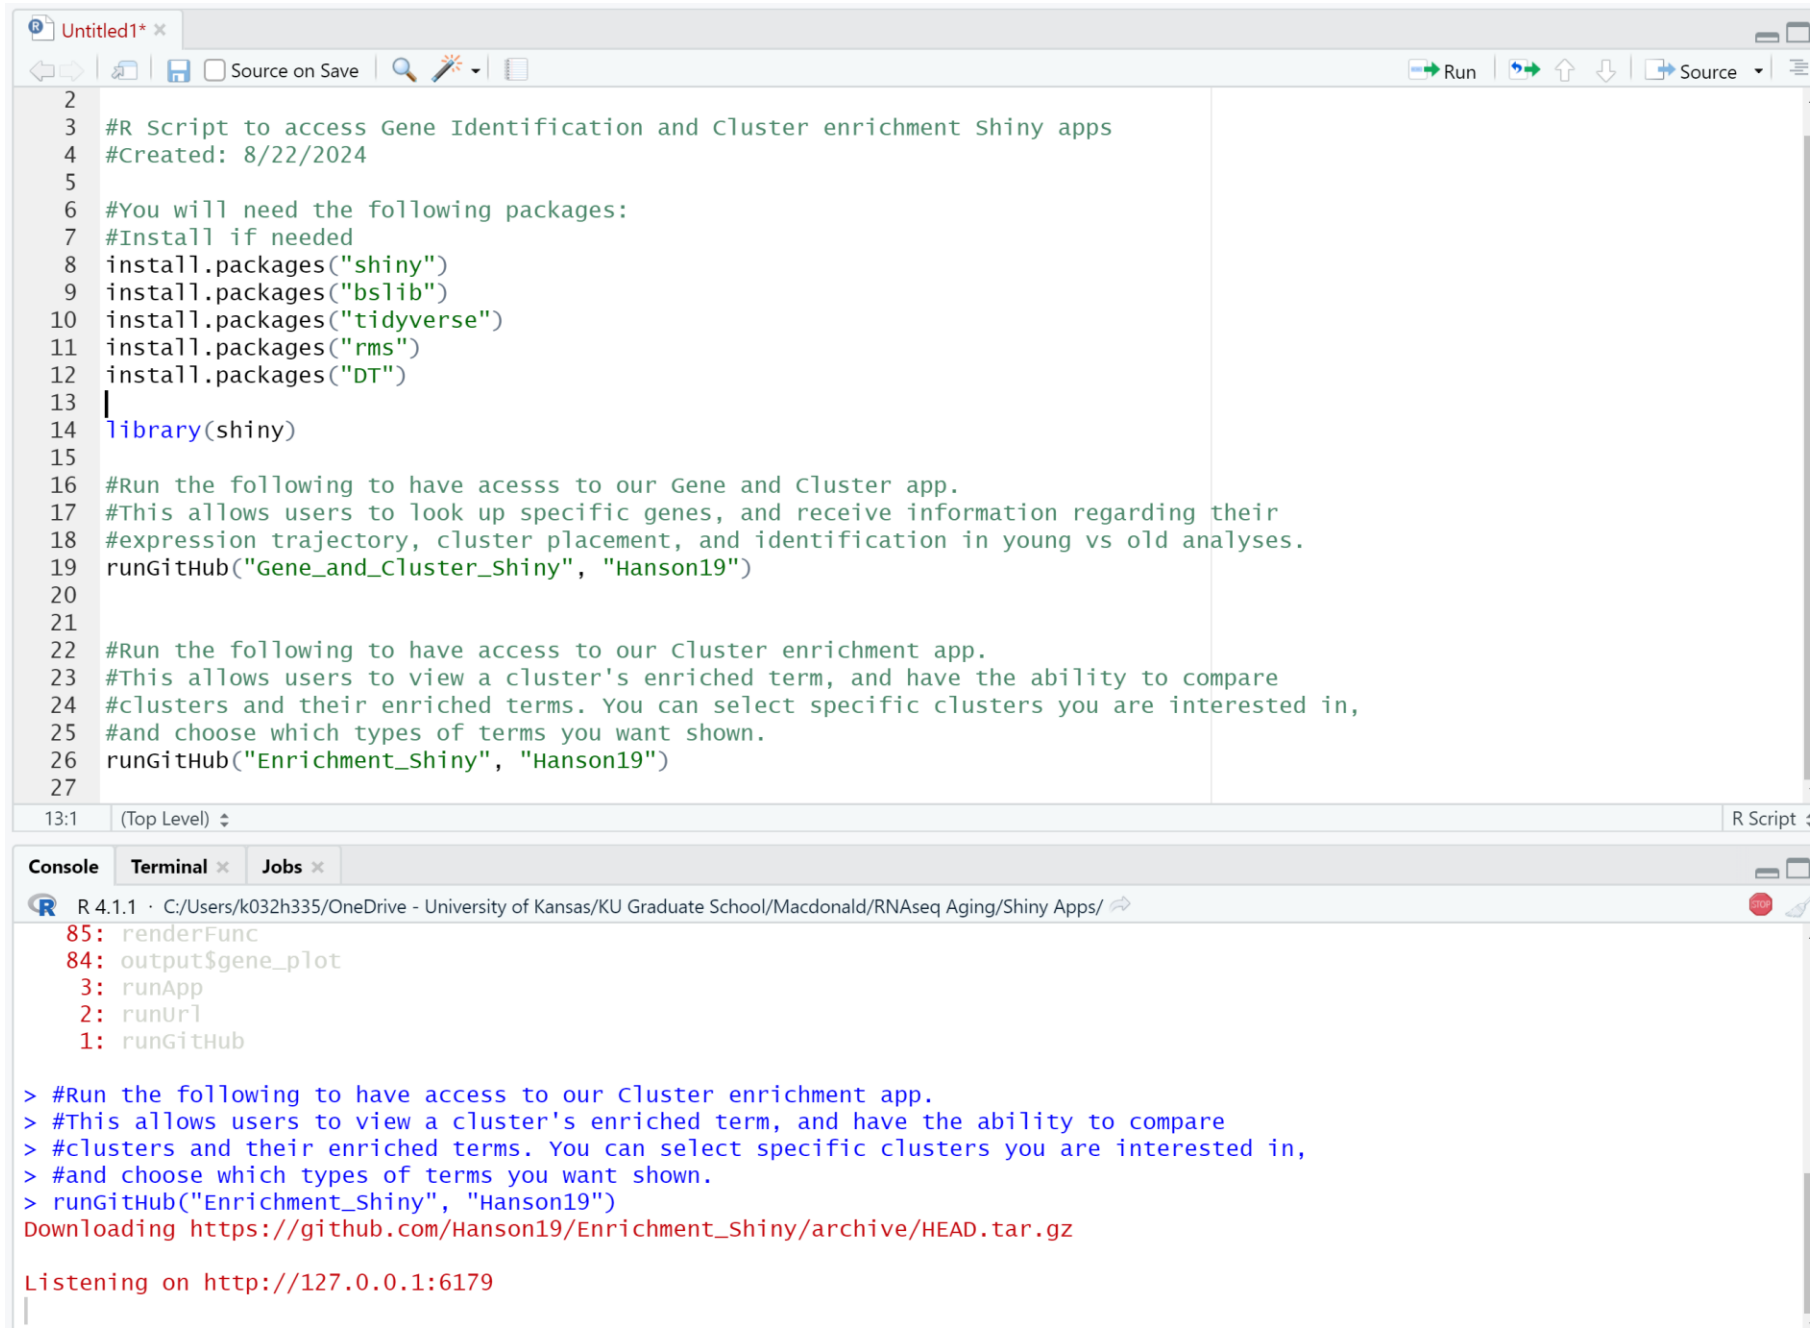

The screenshot displays the RStudio environment. The top pane shows an R script file named 'Untitled1\*' with the following content:

```
2
3 #R Script to access Gene Identification and Cluster enrichment Shiny apps
4 #Created: 8/22/2024
5
6 #You will need the following packages:
7 #Install if needed
8 install.packages("shiny")
9 install.packages("bslib")
10 install.packages("tidyverse")
11 install.packages("rms")
12 install.packages("DT")
13 |
14 library(shiny)
15
16 #Run the following to have access to our Gene and Cluster app.
17 #This allows users to look up specific genes, and receive information regarding their
18 #expression trajectory, cluster placement, and identification in young vs old analyses.
19 runGitHub("Gene_and_Cluster_Shiny", "Hanson19")
20
21
22 #Run the following to have access to our Cluster enrichment app.
23 #This allows users to view a cluster's enriched term, and have the ability to compare
24 #clusters and their enriched terms. You can select specific clusters you are interested in,
25 #and choose which types of terms you want shown.
26 runGitHub("Enrichment_Shiny", "Hanson19")
27
```

The bottom pane shows the R console output for the script execution:

```
R 4.1.1 · C:/Users/k032h335/OneDrive - University of Kansas/KU Graduate School/Macdonald/RNAseq Aging/Shiny Apps/
85: renderFunc
84: output$gene_plot
3: runApp
2: runUrl
1: runGitHub

> #Run the following to have access to our Cluster enrichment app.
> #This allows users to view a cluster's enriched term, and have the ability to compare
> #clusters and their enriched terms. You can select specific clusters you are interested in,
> #and choose which types of terms you want shown.
> runGitHub("Enrichment_Shiny", "Hanson19")
Downloading https://github.com/Hanson19/Enrichment_Shiny/archive/HEAD.tar.gz

Listening on http://127.0.0.1:6179
```

A window that looks like this should pop up. The output of this app is a lot bigger than that of the gene and cluster app so it may not all fit on one page and require scrolling.

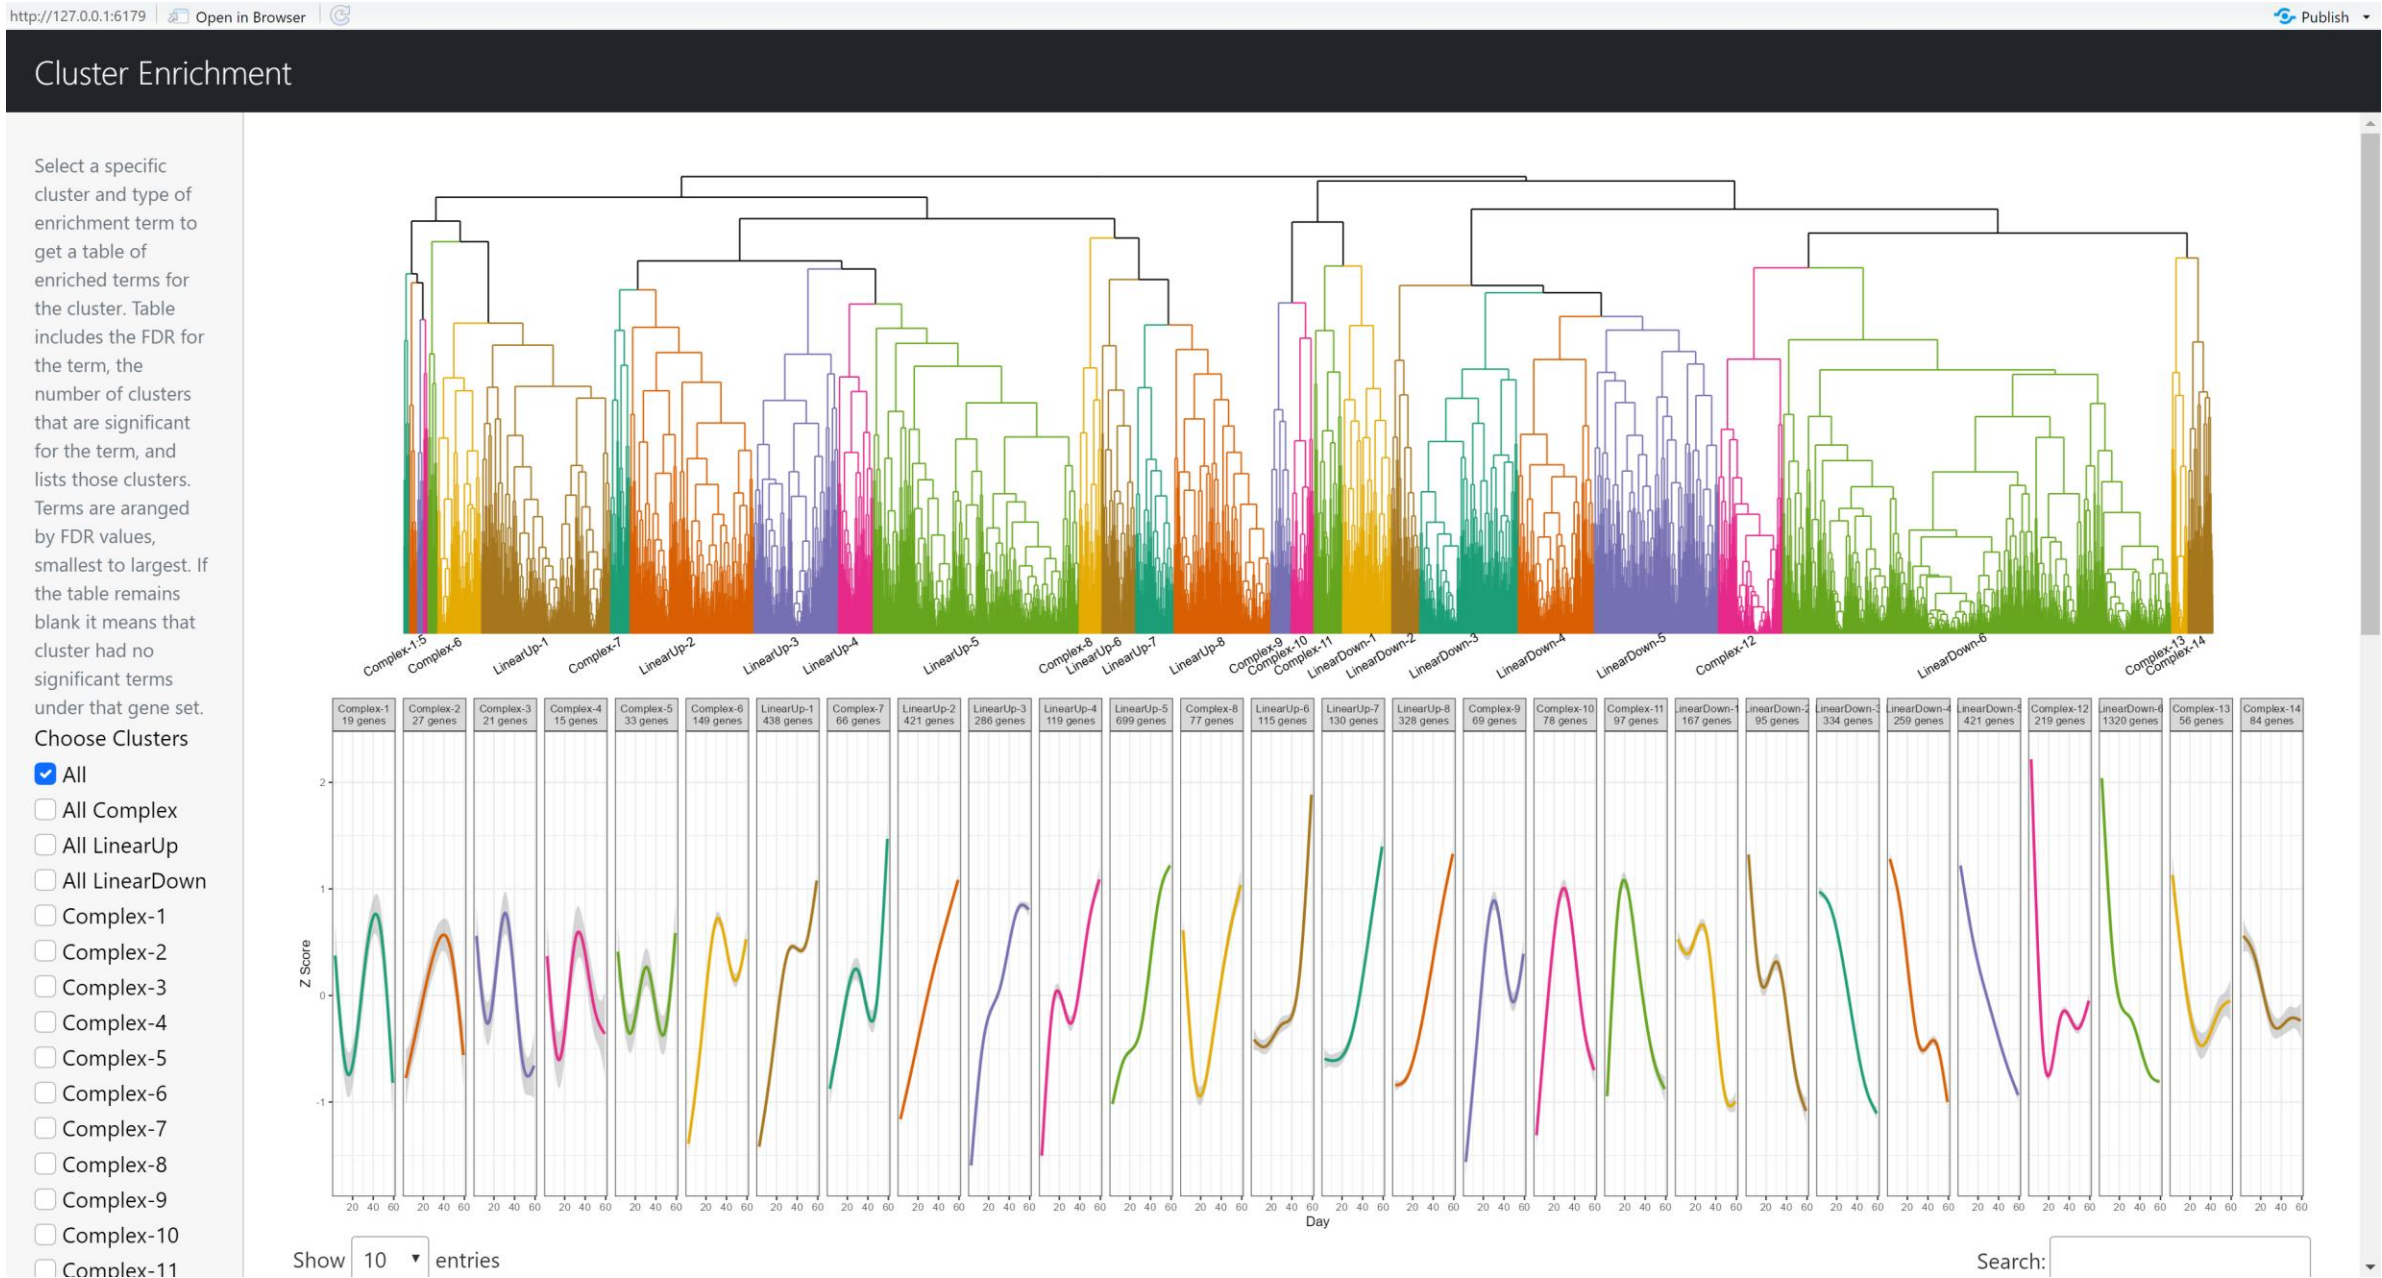

# Sidebar features:

Select which clusters you want to see enriched terms for. You can choose to look at multiple clusters at the same time. App defaults to “All”.

Cluster Enrichment

Choose Clusters

☒ All

☐ All Complex

☐ All LinearUp

☐ All LinearDown

☐ Complex-1

☐ Complex-2

☐ Complex-3

☐ Complex-4

☐ Complex-5

☐ Complex-6

☐ Complex-7

☐ Complex-8

☐ Complex-9

☐ Complex-10

☐ Complex-11

☐ Complex-12

☐ Complex-13

☐ Complex-14

☐ LinearUp-1

☐ LinearUp-2

☐ LinearUp-3

☐ LinearUp-4

☐ LinearUp-5

☐ LinearUp-6

☐ LinearUp-7

☐ LinearUp-8

☐ LinearDown-1

☐ LinearDown-2

☐ LinearDown-3

☐ LinearDown-4

☐ LinearDown-5

☐ LinearDown-6

Select what type of terms you want to see. Can look at multiple types at the same time.

Select All Enrichment Term Types

☒ SLIM2 GO BP

☐ SLIM2 GO CC

☐ SLIM2 GO MF

☐ DRSC GLAD Gene Group

☐ FlyBase Gene Group

☐ REACTOME pathway

If multiple clusters are selected, you can choose to show all terms the clusters are enriched. You can also compare clusters by either only showing terms that are shared between selected clusters or terms that are unique to one of the selected clusters.

Cluster Comparison

☒ Show All Terms

☐ Show Shared Terms between Clusters

☐ Show Unique Terms between Clusters

Dendrogram in the top panel, and representative cluster expression curves in the second panel. The dendrogram will highlight clusters that are selected, and only the representative curves of selected clusters will be plotted.

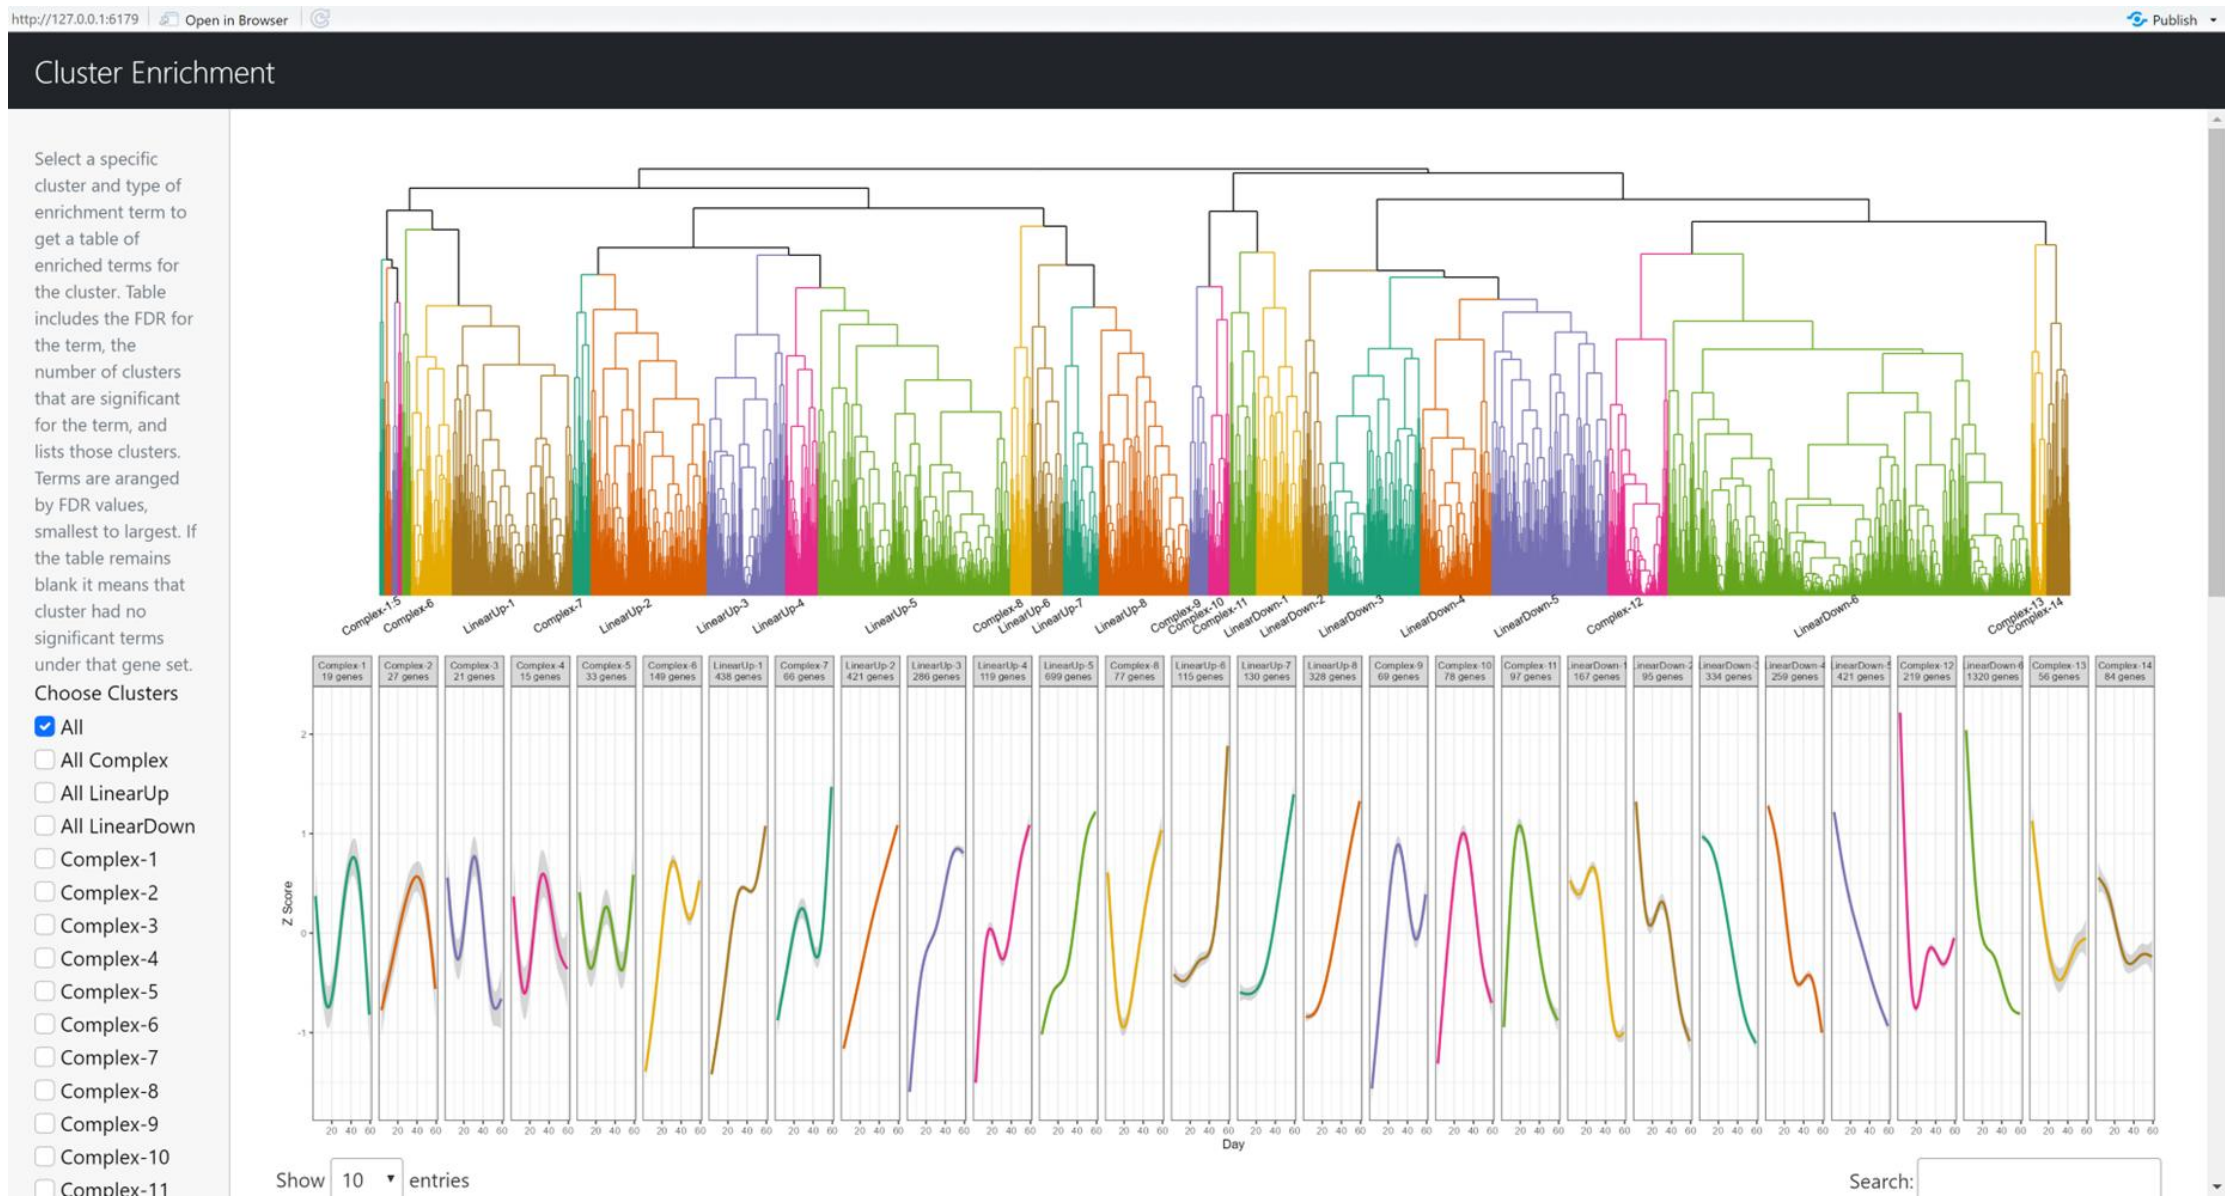



# Only Complex clusters are selected in this example.

## Cluster Enrichment

Select a specific cluster and type of enrichment term to get a table of enriched terms for the cluster. Table includes the FDR for the term, the number of clusters that are significant for the term, and lists those clusters. Terms are arranged by FDR values, smallest to largest. If the table remains blank it means that cluster had no significant terms under that gene set.

Choose Clusters

- ☐ All
- ☒ All Complex
- ☐ All LinearUp
- ☐ All LinearDown
- ☐ Complex-1
- ☐ Complex-2
- ☐ Complex-3
- ☐ Complex-4
- ☐ Complex-5
- ☐ Complex-6
- ☐ Complex-7
- ☐ Complex-8
- ☐ Complex-9
- ☐ Complex-10
- ☐ Complex-11

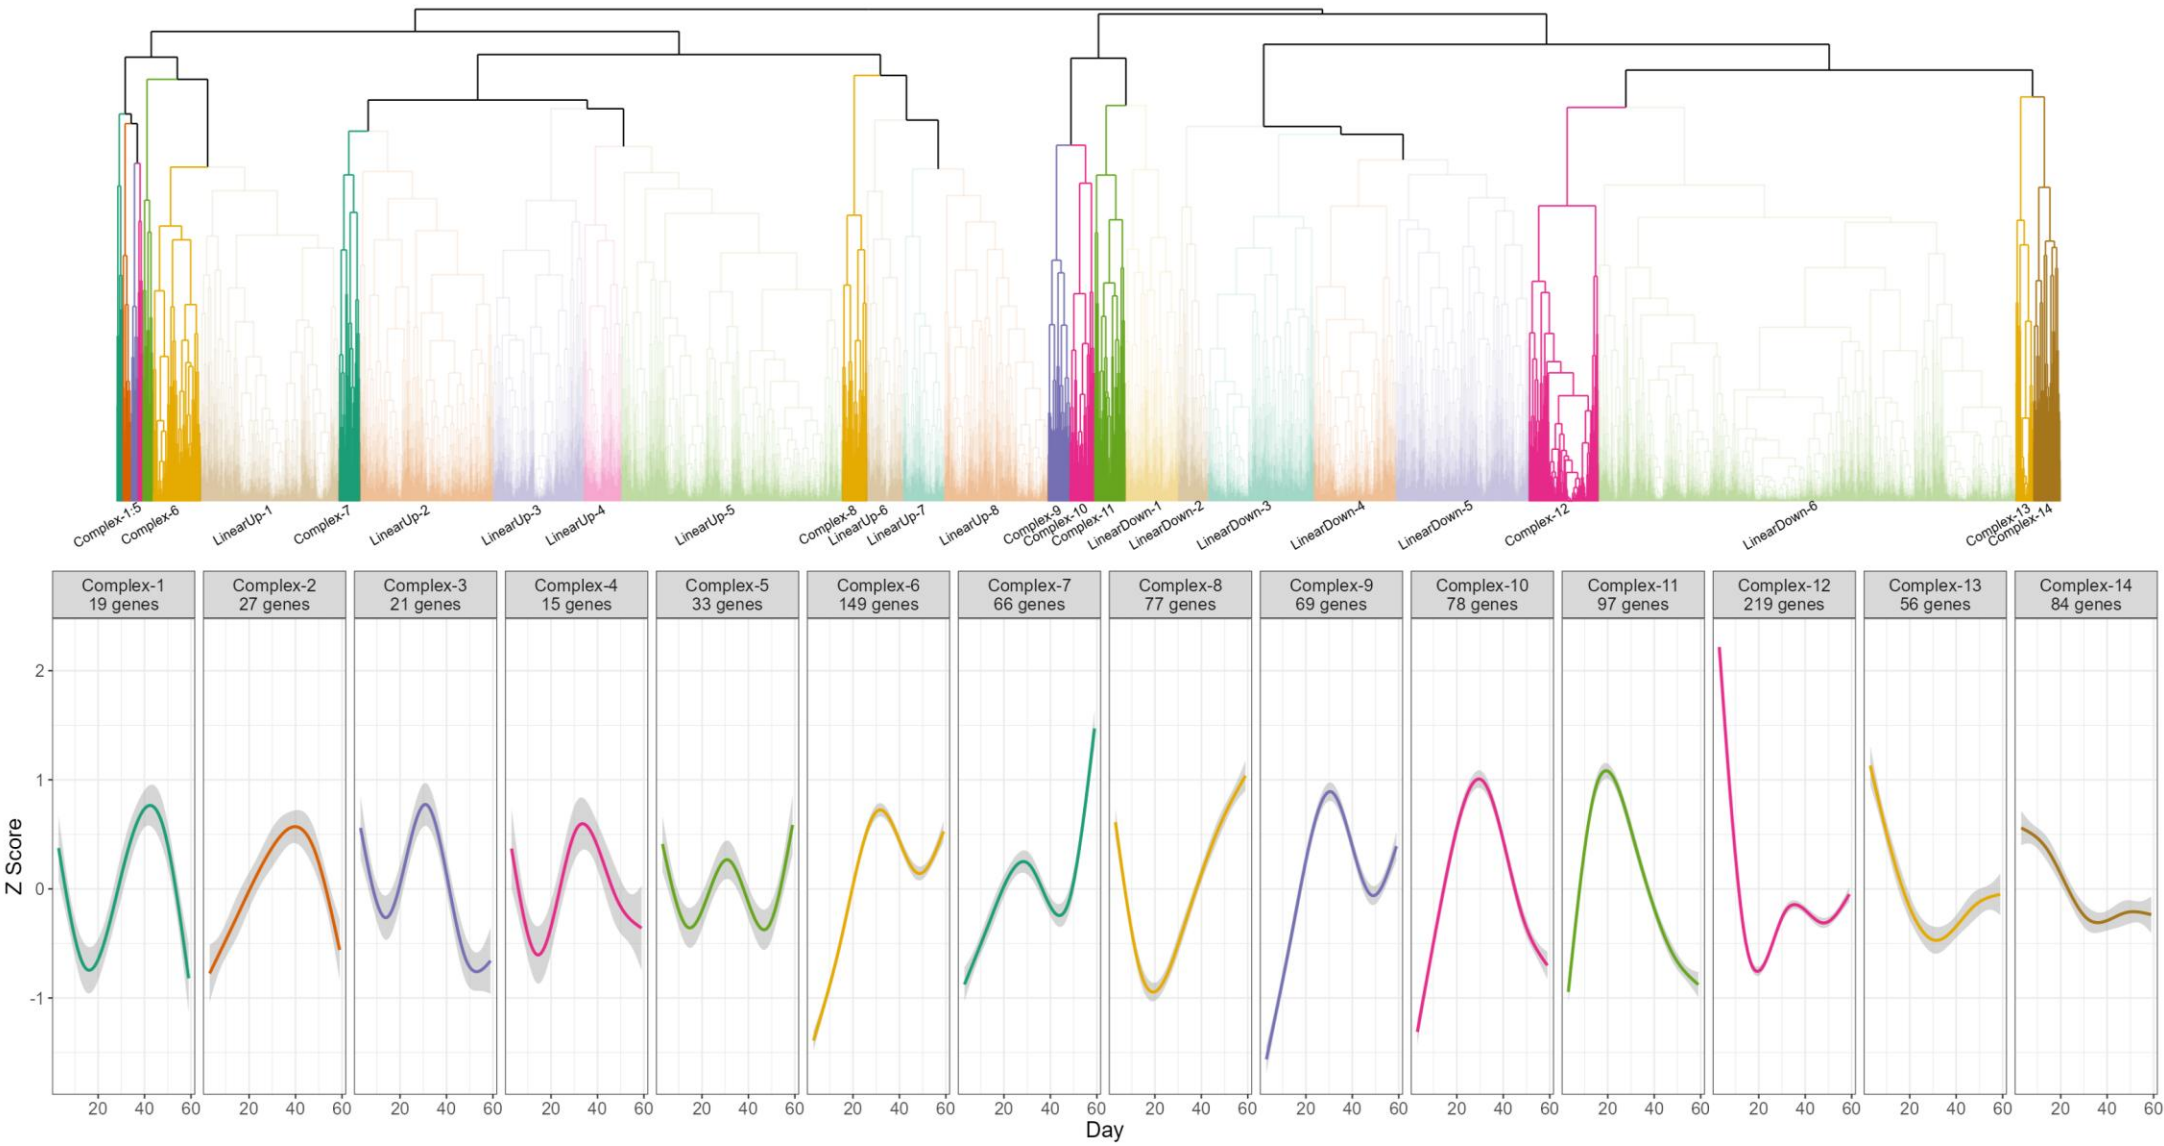

Show 10 entries

Search:

Only Complex-6 and LinearUp-1 are selected here.

Cluster Enrichment

Select a specific cluster and type of enrichment term to get a table of enriched terms for the cluster. Table includes the FDR for the term, the number of clusters that are significant for the term, and lists those clusters. Terms are arranged by FDR values, smallest to largest. If the table remains blank it means that cluster had no significant terms under that gene set.

Choose Clusters

- ☒ All
- ☐ All Complex
- ☐ All LinearUp
- ☐ All LinearDown
- ☐ Complex-1
- ☐ Complex-2
- ☐ Complex-3
- ☐ Complex-4
- ☐ Complex-5
- ☒ Complex-6
- ☐ Complex-7
- ☐ Complex-8
- ☐ Complex-9
- ☐ Complex-10
- ☐ Complex-11
- ☐ Complex-12
- ☐ Complex-13
- ☐ Complex-14
- ☒ LinearUp-1
- ☐ LinearUp-2

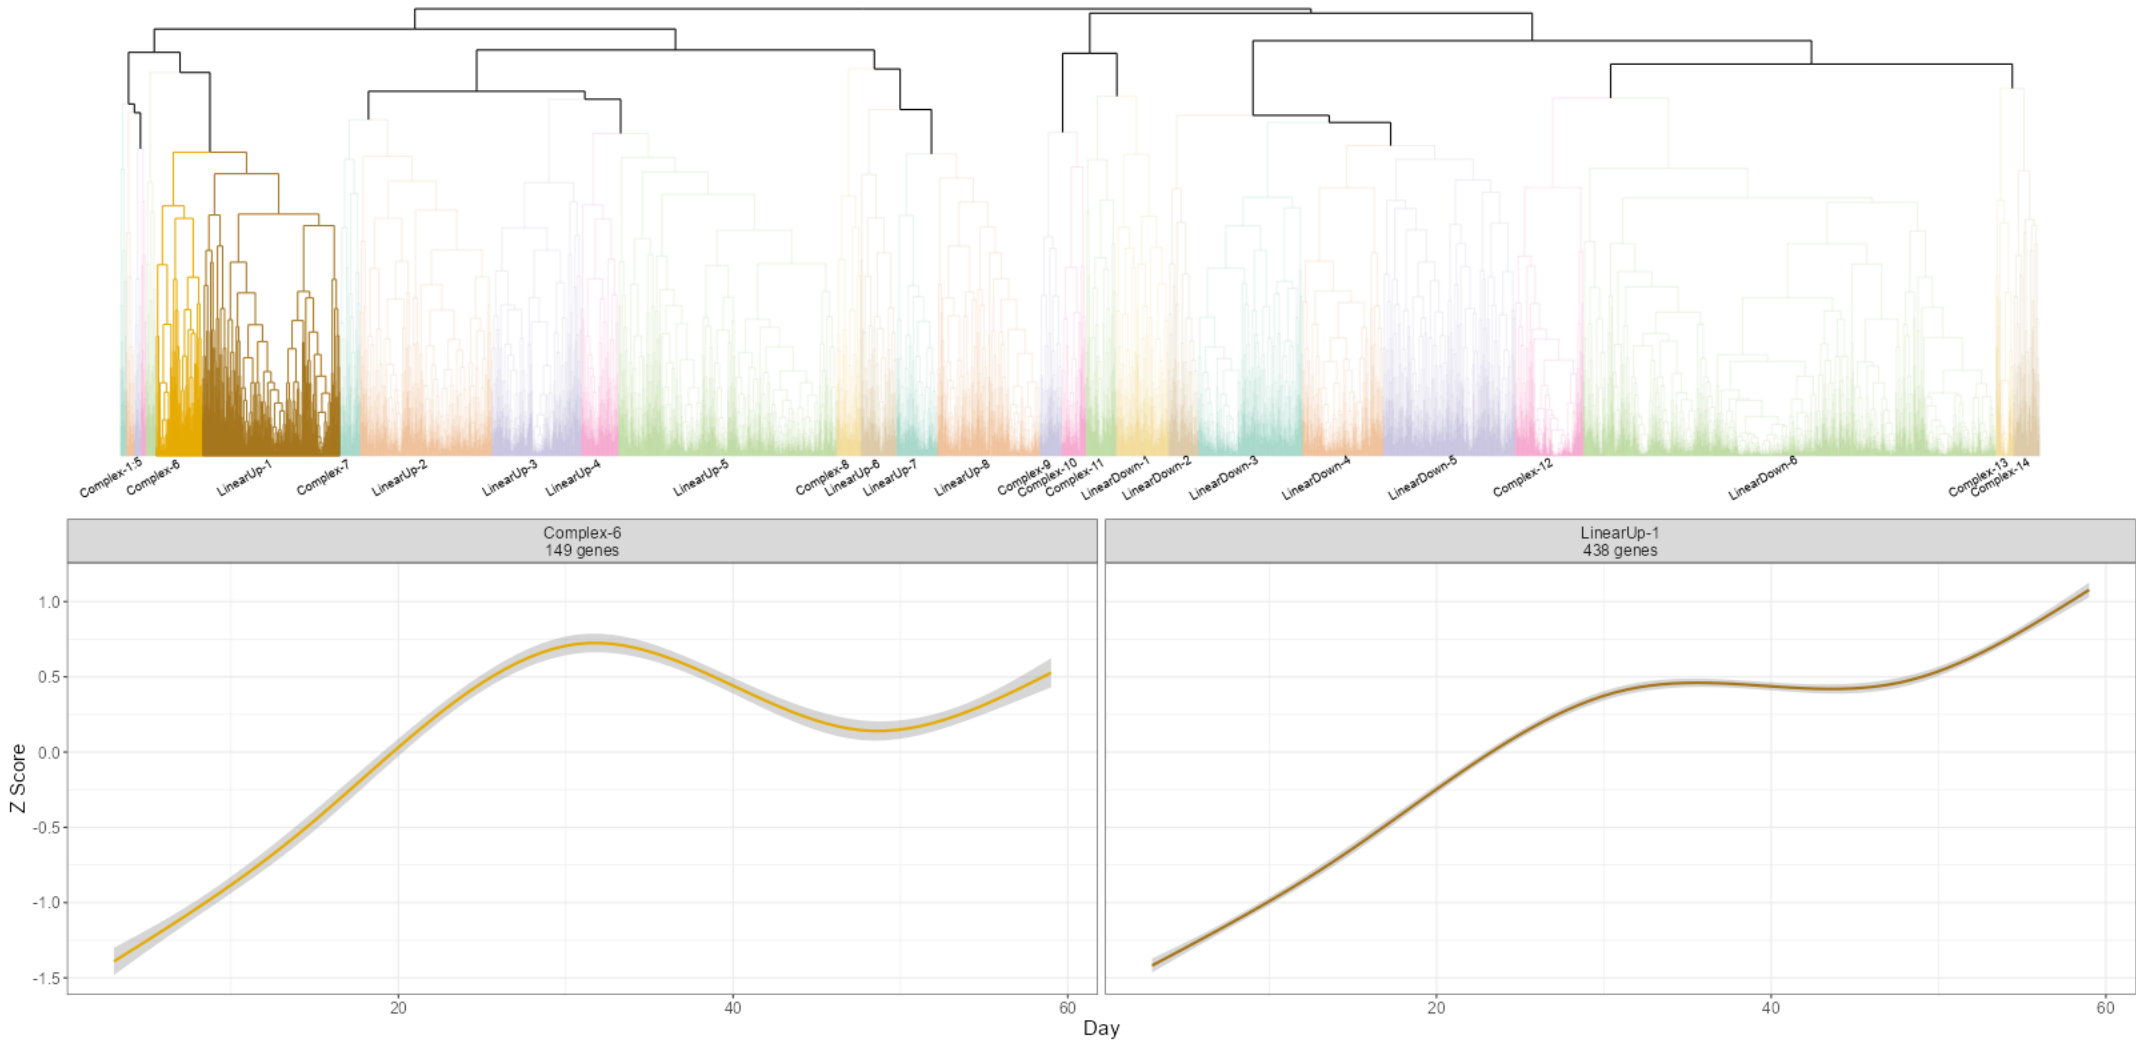

Show 10 entries

Search:

The last panel is a table of the selected cluster's enriched terms. Here we are listing all the enriched SLIM2 GO BP terms in all the clusters based on selections in our sidebar.

Cluster Enrichment

☐ Complex-13

☐ Complex-14

☐ LinearUp-1

☐ LinearUp-2

☐ LinearUp-3

☐ LinearUp-4

☐ LinearUp-5

☐ LinearUp-6

☐ LinearUp-7

☐ LinearUp-8

☐ LinearDown-1

☐ LinearDown-2

☐ LinearDown-3

☐ LinearDown-4

☐ LinearDown-5

☐ LinearDown-6

Select All Enrichment Term Types

☒ SLIM2 GO BP

☐ SLIM2 GO CC

☐ SLIM2 GO MF

☐ DRSC GLAD Gene Group

☐ FlyBase Gene Group

☐ REACTOME pathway

Cluster Comparison

☒ Show All Terms

☐ Show Shared Terms between Clusters

☐ Show Unique Terms between Clusters

Show 

10

 entries

Search:

|    | Gene.Set    | Gene.Set.ID | Gene.Set.Name                                  | Cluster      | FDR      | Num.Cluster.Genes | Gene.Set.Size | Total.Num.Cluster.Genes | Num.Sig.Clusters | All.Sig.Clusters                                                 |
|----|-------------|-------------|------------------------------------------------|--------------|----------|-------------------|---------------|-------------------------|------------------|------------------------------------------------------------------|
| 1  | SLIM2 GO BP | GO:0042254  | ribosome biogenesis                            | LinearUp-4   | 5.5e-24  | 34                | 206           | 119                     | 4                | LinearUp-1, LinearUp-2, LinearUp-4, LinearUp-6                   |
| 2  | SLIM2 GO BP | GO:0002181  | cytoplasmic translation                        | LinearUp-1   | 8e-24    | 42                | 128           | 438                     | 3                | Complex-6, LinearUp-1, LinearUp-2                                |
| 3  | SLIM2 GO BP | GO:0006811  | ion transport                                  | LinearDown-6 | 8.1e-24  | 136               | 514           | 1320                    | 2                | Complex-12, LinearDown-6                                         |
| 4  | SLIM2 GO BP | GO:0002181  | cytoplasmic translation                        | Complex-6    | 3.07e-21 | 24                | 128           | 149                     | 3                | Complex-6, LinearUp-1, LinearUp-2                                |
| 5  | SLIM2 GO BP | GO:0016072  | rRNA metabolic process                         | LinearUp-4   | 6.13e-19 | 21                | 138           | 119                     | 3                | LinearUp-1, LinearUp-4, LinearUp-6                               |
| 6  | SLIM2 GO BP | GO:0050808  | synapse organization                           | LinearDown-6 | 1.02e-11 | 72                | 295           | 1320                    | 3                | LinearDown-3, LinearDown-4, LinearDown-6                         |
| 7  | SLIM2 GO BP | GO:0006091  | generation of precursor metabolites and energy | LinearDown-6 | 1.11e-10 | 57                | 218           | 1320                    | 3                | Complex-12, Complex-3, LinearDown-6                              |
| 8  | SLIM2 GO BP | GO:0016192  | vesicle-mediated transport                     | LinearUp-7   | 1.32e-09 | 25                | 510           | 130                     | 5                | LinearDown-4, LinearDown-6, LinearUp-5, LinearUp-7, LinearUp-8   |
| 9  | SLIM2 GO BP | GO:0007399  | nervous system development                     | LinearDown-4 | 1.6e-09  | 56                | 1112          | 259                     | 5                | LinearDown-3, LinearDown-4, LinearDown-6, LinearUp-2, LinearUp-5 |
| 10 | SLIM2 GO BP | GO:0006281  | DNA repair                                     | LinearUp-3   | 2.82e-09 | 22                | 179           | 286                     | 2                | LinearUp-2, LinearUp-3                                           |

Showing 1 to 10 of 141 entries

Previous

1

2

3

4

5

...

15

Next

Breakdown of enriched terms table:

| Term identification information |             |               | Enriched cluster        |              | Benjamini Hochberg false discovery rate | Number of genes in cluster associated with term | Total number of genes associated with term | Total number of genes in the cluster | Total number of enriched clusters | List of all enriched clusters                  |
|---------------------------------|-------------|---------------|-------------------------|--------------|-----------------------------------------|-------------------------------------------------|--------------------------------------------|--------------------------------------|-----------------------------------|------------------------------------------------|
| Gene.Set                        | Gene.Set.ID | Gene.Set.Name | Cluster                 | FDR          | Num.Cluster.Genes                       | Gene.Set.Size                                   | Total.Num.Cluster.Genes                    | Num.Sig.Clusters                     | All.Sig.Clusters                  |                                                |
| 1                               | SLIM2 GO BP | GO:0042254    | ribosome biogenesis     | LinearUp-4   | 5.5e-24                                 | 34                                              | 206                                        | 119                                  | 4                                 | LinearUp-1, LinearUp-2, LinearUp-4, LinearUp-6 |
| 2                               | SLIM2 GO BP | GO:0002181    | cytoplasmic translation | LinearUp-1   | 8e-24                                   | 42                                              | 128                                        | 438                                  | 3                                 | Complex-6, LinearUp-1, LinearUp-2              |
| 3                               | SLIM2 GO BP | GO:0006811    | ion transport           | LinearDown-6 | 8.1e-24                                 | 136                                             | 514                                        | 1320                                 | 2                                 | Complex-12, LinearDown-6                       |
| 4                               | SLIM2 GO BP | GO:0002181    | cytoplasmic translation | Complex-6    | 3.07e-21                                | 24                                              | 128                                        | 149                                  | 3                                 | Complex-6, LinearUp-1, LinearUp-2              |



Can use search bar to lookup terms containing certain words.

Here we have pulled out enriched terms across all clusters that are part of SLIM2 GO BP and MF sets that have “ribosome” within their name.

Cluster Enrichment

- ☐ Complex-13
- ☐ Complex-14
- ☐ LinearUp-1
- ☐ LinearUp-2
- ☐ LinearUp-3
- ☐ LinearUp-4
- ☐ LinearUp-5
- ☐ LinearUp-6
- ☐ LinearUp-7
- ☐ LinearUp-8
- ☐ LinearDown-1
- ☐ LinearDown-2
- ☐ LinearDown-3
- ☐ LinearDown-4
- ☐ LinearDown-5
- ☐ LinearDown-6

- Select All Enrichment Term Types
- ☒ SLIM2 GO BP
  - ☐ SLIM2 GO CC
  - ☒ SLIM2 GO MF
  - ☐ DRSC GLAD Gene Group
  - ☐ FlyBase Gene Group
  - ☐ REACTOME pathway

- Cluster Comparison
- ☒ Show All Terms
  - ☐ Show Shared Terms between Clusters
  - ☐ Show Unique Terms between Clusters

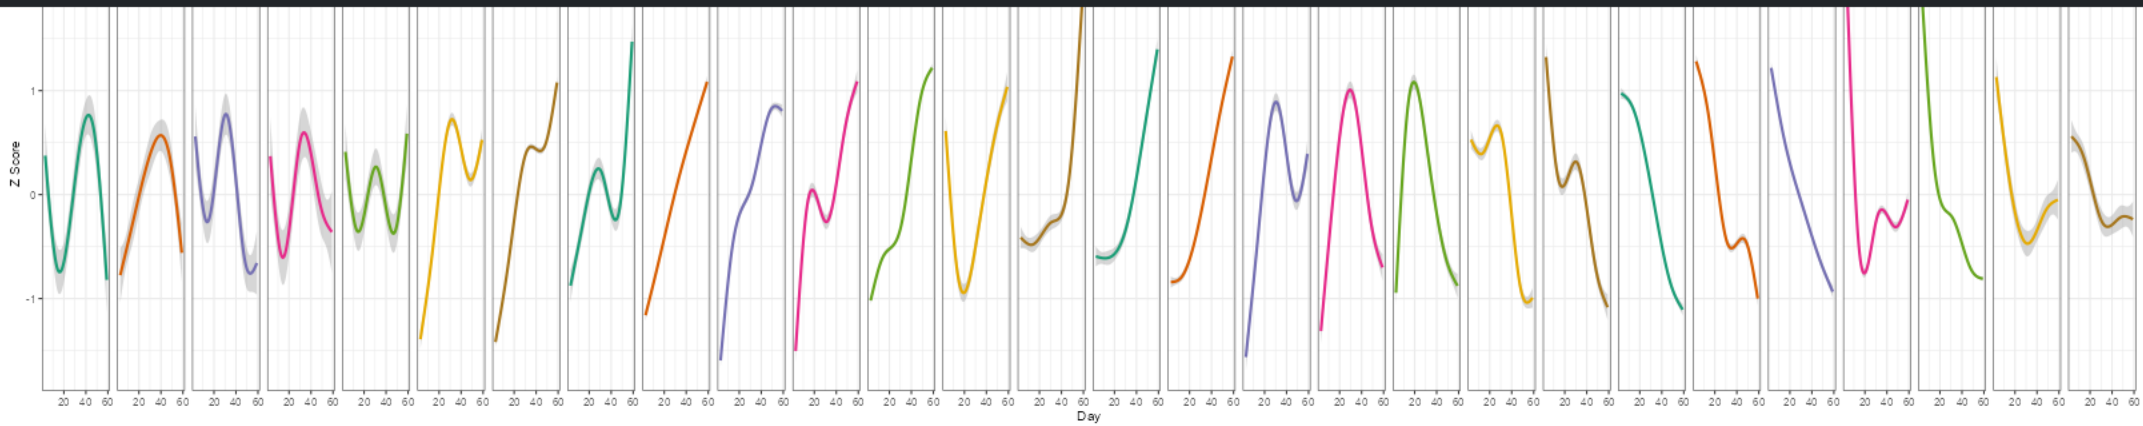

Show  entries Search:

|     | Gene.Set    | Gene.Set.ID | Gene.Set.Name                      | Cluster    | FDR      | Num.Cluster.Genes | Gene.Set.Size | Total.Num.Cluster.Genes | Num.Sig.Clusters | All.Sig.Clusters                               |
|-----|-------------|-------------|------------------------------------|------------|----------|-------------------|---------------|-------------------------|------------------|------------------------------------------------|
| 1   | SLIM2 GO BP | GO:0042254  | ribosome biogenesis                | LinearUp-4 | 5.5e-24  | 34                | 206           | 119                     | 4                | LinearUp-1, LinearUp-2, LinearUp-4, LinearUp-6 |
| 4   | SLIM2 GO MF | GO:0003735  | structural constituent of ribosome | LinearUp-1 | 1.34e-21 | 40                | 171           | 438                     | 2                | Complex-6, LinearUp-1                          |
| 8   | SLIM2 GO MF | GO:0003735  | structural constituent of ribosome | Complex-6  | 4.01e-17 | 23                | 171           | 149                     | 2                | Complex-6, LinearUp-1                          |
| 26  | SLIM2 GO BP | GO:0042254  | ribosome biogenesis                | LinearUp-1 | 7.12e-07 | 25                | 206           | 438                     | 4                | LinearUp-1, LinearUp-2, LinearUp-4, LinearUp-6 |
| 81  | SLIM2 GO BP | GO:0042254  | ribosome biogenesis                | LinearUp-6 | 0.00201  | 9                 | 206           | 115                     | 4                | LinearUp-1, LinearUp-2, LinearUp-4, LinearUp-6 |
| 115 | SLIM2 GO BP | GO:0042254  | ribosome biogenesis                | LinearUp-2 | 0.0105   | 15                | 206           | 421                     | 4                | LinearUp-1, LinearUp-2, LinearUp-4, LinearUp-6 |

We can also compare clusters based on the selected cluster comparison option on the sidebar. Here we are showing terms that are shared by LinearUp-2, LinearUp-5, and LinearUp-8 across all term sets.

Cluster Enrichment

☐ Complex-13

☐ Complex-14

☐ LinearUp-1

☒ LinearUp-2

☐ LinearUp-3

☐ LinearUp-4

☒ LinearUp-5

☐ LinearUp-6

☐ LinearUp-7

☒ LinearUp-8

☐ LinearDown-1

☐ LinearDown-2

☐ LinearDown-3

☐ LinearDown-4

☐ LinearDown-5

☐ LinearDown-6

Select All Enrichment Term Types

☒ SLIM2 GO BP

☒ SLIM2 GO CC

☒ SLIM2 GO MF

☒ DRSC GLAD Gene Group

☒ FlyBase Gene Group

☒ REACTOME pathway

Cluster Comparison

☐ Show All Terms

☒ Show Shared Terms between Clusters

☐ Show Unique Terms between Clusters

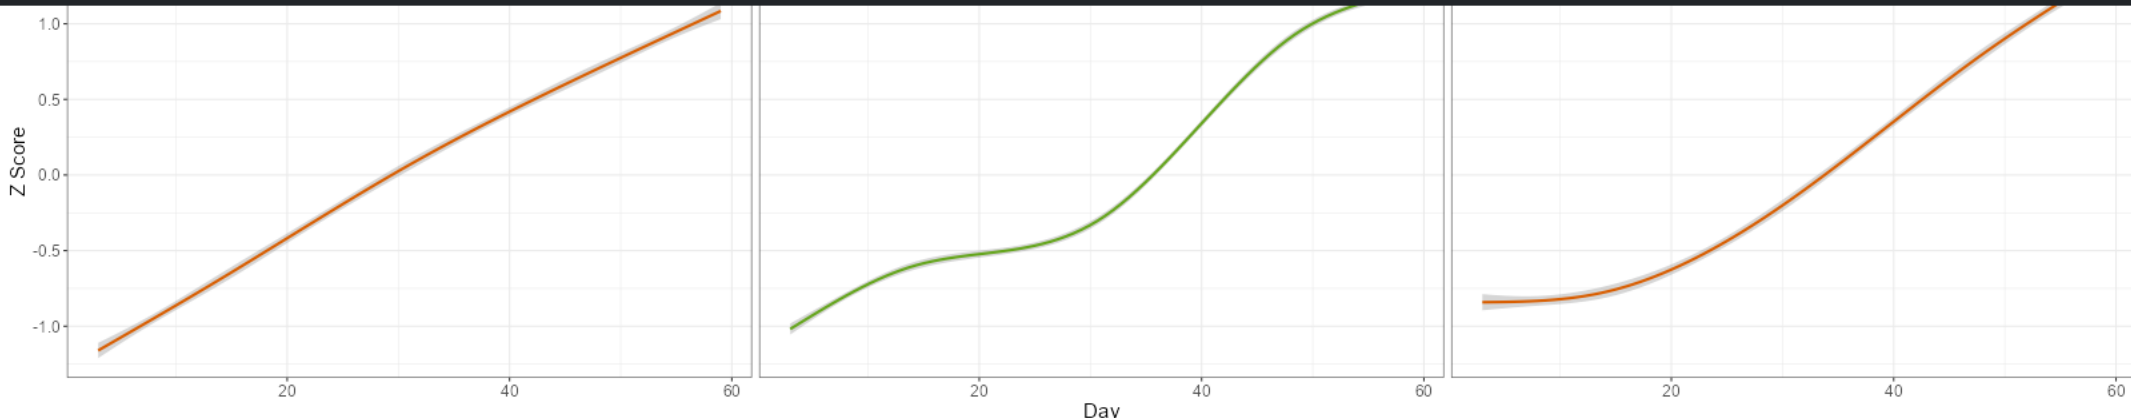

Show 

10

 entries 

Search:

|   | Gene.Set    | Gene.Set.ID | Gene.Set.Name      | Cluster    | FDR      | Num.Cluster.Genes | Gene.Set.Size | Total.Num.Cluster.Genes | Num.Sig.Clusters | All.Sig.Clusters                                           |
|---|-------------|-------------|--------------------|------------|----------|-------------------|---------------|-------------------------|------------------|------------------------------------------------------------|
| 1 | SLIM2 GO BP | GO:0006950  | response to stress | LinearUp-2 | 5.37e-09 | 80                | 1197          | 421                     | 5                | LinearUp-2, LinearUp-3, LinearUp-5, LinearUp-7, LinearUp-8 |
| 2 | SLIM2 GO BP | GO:0006950  | response to stress | LinearUp-5 | 3.05e-09 | 115               | 1197          | 699                     | 5                | LinearUp-2, LinearUp-3, LinearUp-5, LinearUp-7, LinearUp-8 |
| 3 | SLIM2 GO BP | GO:0006950  | response to stress | LinearUp-8 | 0.000351 | 54                | 1197          | 328                     | 5                | LinearUp-2, LinearUp-3, LinearUp-5, LinearUp-7, LinearUp-8 |
| 4 | SLIM2 GO BP | GO:0006955  | immune response    | LinearUp-2 | 0.00105  | 22                | 287           | 421                     | 3                | LinearUp-2, LinearUp-5, LinearUp-8                         |
| 5 | SLIM2 GO BP | GO:0006955  | immune response    | LinearUp-5 | 1.85e-06 | 38                | 287           | 699                     | 3                | LinearUp-2, LinearUp-5, LinearUp-8                         |
| 6 | SLIM2 GO BP | GO:0006955  | immune response    | LinearUp-8 | 2e-04    | 22                | 287           | 328                     | 3                | LinearUp-2, LinearUp-5, LinearUp-8                         |

Now showing enriched terms in LinearUp-2, 5 and 8 that are not shared with each other. The term doesn't have to be unique to that cluster, it just can't be found in the other two, as seen in rows 4-7 of the table.

Cluster Enrichment

☐ Complex-13

☐ Complex-14

☐ LinearUp-1

☒ LinearUp-2

☐ LinearUp-3

☐ LinearUp-4

☒ LinearUp-5

☐ LinearUp-6

☐ LinearUp-7

☒ LinearUp-8

☐ LinearDown-1

☐ LinearDown-2

☐ LinearDown-3

☐ LinearDown-4

☐ LinearDown-5

☐ LinearDown-6

Select All Enrichment Term Types

☒ SLIM2 GO BP

☒ SLIM2 GO CC

☒ SLIM2 GO MF

☒ DRSC GLAD Gene Group

☒ FlyBase Gene Group

☒ REACTOME pathway

Cluster Comparison

☐ Show All Terms

☐ Show Shared Terms between Clusters

☒ Show Unique Terms between Clusters

204060204060204060204060

Day

Show 10 entries

Search:

|    | Gene.Set             | Gene.Set.ID | Gene.Set.Name                                      | Cluster    | FDR      | Num.Cluster.Genes | Gene.Set.Size | Total.Num.Cluster.Genes | Num.Sig.Clusters | All.Sig.Clusters                   |
|----|----------------------|-------------|----------------------------------------------------|------------|----------|-------------------|---------------|-------------------------|------------------|------------------------------------|
| 1  | FlyBase Gene Group   | FBgg0000721 | BOMANINS                                           | LinearUp-5 | 1.58e-07 | 9                 | 12            | 699                     | 1                | LinearUp-5                         |
| 2  | DRSC GLAD Gene Group | GLAD:24590  | Major signaling pathways                           | LinearUp-5 | 1.72e-05 | 40                | 330           | 699                     | 1                | LinearUp-5                         |
| 3  | SLIM2 GO BP          | GO:0060541  | respiratory system development                     | LinearUp-5 | 3.89e-05 | 32                | 252           | 699                     | 1                | LinearUp-5                         |
| 4  | FlyBase Gene Group   | FBgg0000215 | ENDOSOMAL SORTING COMPLEXES REQUIRED FOR TRANSPORT | LinearUp-5 | 5.5e-05  | 9                 | 20            | 699                     | 2                | LinearUp-1, LinearUp-5             |
| 5  | SLIM2 GO BP          | GO:0051301  | cell division                                      | LinearUp-2 | 0.000127 | 24                | 269           | 421                     | 3                | LinearUp-2, LinearUp-3, LinearUp-7 |
| 6  | SLIM2 GO BP          | GO:0051321  | meiotic cell cycle                                 | LinearUp-2 | 0.000129 | 21                | 221           | 421                     | 2                | LinearUp-2, LinearUp-3             |
| 7  | SLIM2 GO BP          | GO:0000278  | mitotic cell cycle                                 | LinearUp-2 | 0.000173 | 34                | 487           | 421                     | 2                | LinearUp-2, LinearUp-3             |
| 8  | SLIM2 GO BP          | GO:0006260  | DNA replication                                    | LinearUp-2 | 0.000241 | 13                | 103           | 421                     | 1                | LinearUp-2                         |
| 9  | FlyBase Gene Group   | FBgg0000390 | CYTOPLASMIC AMINOACYL-TRNA SYNTHETASES             | LinearUp-5 | 0.000925 | 7                 | 16            | 699                     | 1                | LinearUp-5                         |
| 10 | FlyBase Gene Group   | FBgg0001102 | UNCLASSIFIED ANTIMICROBIAL PEPTIDES                | LinearUp-5 | 0.000925 | 5                 | 7             | 699                     | 1                | LinearUp-5                         |

Showing 1 to 10 of 80 entries

Previous

1

2

3

4

5

...

8

Next
